# Supplementary material for: Association of Prenatal Exposure to Persistent Organic Pollutants with Obesity and Cardiometabolic Traits in Early Childhood: The Rhea Mother–Child Cohort (Crete, Greece)
Source: PubMed Central journal article supplement (PMC4590761; doi:10.1289/ehp.1409062), 2015-04-24
Supplement: ehp.1409062.s001.acco.pdf [file ehp.1409062.s001.acco.pdf]

**Note to Readers:** *EHP* strives to ensure that all journal content is accessible to all readers. However, some figures and Supplemental Material published in *EHP* articles may not conform to 508 standards due to the complexity of the information being presented. If you need assistance accessing journal content, please contact [ehp508@niehs.nih.gov](mailto:ehp508@niehs.nih.gov). Our staff will work with you to assess and meet your accessibility needs within 3 working days.

## **Supplemental Material**

### **Association of Prenatal Exposure to Persistent Organic Pollutants with Obesity and Cardiometabolic Traits in Early Childhood: The Rhea Mother–Child Cohort (Crete, Greece)**

Marina Vafeiadi, Vaggelis Georgiou, Georgia Chalkiadaki, Panu Rantakokko, Hannu Kiviranta, Marianna Karachaliou, Eleni Fthenou, Maria Venihaki, Katerina Sarri, Maria Vassilaki, Soterios A. Kyrtopoulos, Emily Oken, Manolis Kogevinas, and Leda Chatzi

#### **Table of Contents**

**Table S1.** Maternal and child characteristics of participants and non-participants.

**Table S2.** Maternal and child characteristics by concentrations of first trimester maternal serum POPs levels (pg/ml), Mother-child cohort “Rhea” in Crete, Greece (n=689).

**Table S3.** Associations of in utero POPs exposure with child lipids and adiponectin levels at 4 years of age, Mother-child cohort “Rhea” in Crete, Greece.

**Table S4.** Association between POPs and birth outcomes in multipollutant models including DDE, HCB and PCBs.

**Table S5.** Associations of in utero POPs exposure with child BMI at 4 years of age in the subgroups defined by infant sex, maternal smoking and maternal prepregnancy BMI status.

**Table S6.** Associations of in utero POP exposures with the outcomes under study in the total population and without out preterm births and low birth weight neonates.

**Table S1.** Maternal and child characteristics of participants and non-participants.

| <b>Maternal characteristics</b>                   | <b>Participants<br/>n=689</b> | <b>Non-Participants n=619</b>     | <b>P- value<sup>a</sup></b> |
|---------------------------------------------------|-------------------------------|-----------------------------------|-----------------------------|
| Maternal age (years), mean (SD)                   | 29.9±5.0                      | 28.9±5.0                          | <0.001                      |
| Maternal education, n (%)                         |                               |                                   | <0.001                      |
| Low                                               | 105 (15.5)                    | 166 (27.5)                        |                             |
| Medium                                            | 347 (51.2)                    | 301 (49.9)                        |                             |
| High                                              | 226 (33.3)                    | 136 (22.5)                        |                             |
| Mother's origin, n (%)                            |                               |                                   | <0.001                      |
| Greek                                             | 648 (94.6)                    | 533 (86.5)                        |                             |
| Non greek                                         | 37 (5.4)                      | 83 (13.5)                         |                             |
| Smoking status, n (%)                             |                               |                                   | 0.691                       |
| Smoker                                            | 236 (35.3)                    | 214 (36.2)                        |                             |
| Non-smoker                                        | 432 (64.7)                    | 377 (63.8)                        |                             |
| Parity, n (%)                                     |                               |                                   | 0.265                       |
| Primiparous                                       | 304 (43.6)                    | 240 (39.9)                        |                             |
| Multiparous                                       | 394 (56.4)                    | 362 (60.1)                        |                             |
| Pre-pregnancy BMI (kg/m <sup>2</sup> ), mean (SD) | 24.4±4.7                      | 23.8±4.8                          | 0.002                       |
| Pre-pregnancy BMI categories                      |                               |                                   | 0.639                       |
| < 25 kg/m <sup>2</sup>                            | 459 (68.0)                    | 417 (69.4)                        |                             |
| ≥ 25 kg/m <sup>2</sup>                            | 216 (32.0)                    | 184 (30.6)                        |                             |
| Gestational weight gain (kg), n (%)               | 13.8±5.6                      | 14.1±6.4                          | 0.743                       |
| Delivery type, n (%)                              |                               |                                   | 0.454                       |
| Vaginal                                           | 339 (49.4)                    | 313 (51.6)                        |                             |
| Caesarean                                         | 347 (50.6)                    | 293 (48.3)                        |                             |
| <b>Child characteristics</b>                      |                               |                                   |                             |
| Child gender, n (%)                               |                               |                                   | 0.226                       |
| Male                                              | 358 (52.0)                    | 302 (48.8)                        |                             |
| Female                                            | 331 (48.0)                    | 317 (51.2)                        |                             |
| Breastfeeding (months), n (%)                     |                               |                                   | 0.014                       |
| Ever                                              | 578 (87.2)                    | 436 (82.1)                        |                             |
| Never                                             | 85 (12.8)                     | 95 (17.9)                         |                             |
| Birth weight (kg), mean (SD)                      | 3.20±0.4                      | 3.14±0.4                          | 0.030                       |
| Gestational age (weeks), mean (SD)                | 38.2±1.5                      | 38.2±1.6                          | 0.923                       |
|                                                   | <b>Participants<br/>n=689</b> | <b>Non-Participants<br/>n=433</b> |                             |
| <b>Contaminants</b>                               | <b>Median (IQR)</b>           | <b>Median (IQR)</b>               |                             |
| HCB                                               | 82.53 (54.86)                 | 81.37 (61.16)                     | 0.842                       |
| DDE                                               | 1981.19 (2326.54)             | 2096.96 (2636.32)                 | 0.487                       |
| Total PCBs                                        | 319.42 (266.39)               | 258.5 (233.49)                    | <0.001                      |

<sup>a</sup>Statistically significant differences (p<0.05), based on Mann-Whitney U test for two independent samples and Pearson's  $\chi^2$  test for independence.

**Table S2.** Maternal and child characteristics by concentrations of first trimester maternal serum POPs levels (pg/ml), Mother-child cohort “Rhea” in Crete, Greece (n=689).

| <b>Characteristic</b>                  | <b>N</b> | <b>HCB<br/>r<sup>a</sup> or Mean ± SD</b> | <b>DDE<br/>r<sup>a</sup> or Mean ± SD</b> | <b>PCBs<br/>r<sup>a</sup> or Mean ± SD</b> |
|----------------------------------------|----------|-------------------------------------------|-------------------------------------------|--------------------------------------------|
| Maternal characteristics               |          |                                           |                                           |                                            |
| Maternal age (years)                   | 681      | 0.53*                                     | 0.43*                                     | 0.67*                                      |
| <20                                    | 18       | 52.7±21.0                                 | 1097.8±732.2                              | 120.8±80.9                                 |
| ≥20-30                                 | 276      | 79.2±68.2                                 | 2068.3±2167.5                             | 263.4±176.3                                |
| ≥30-40                                 | 368      | 125.5±95.0                                | 3533.3±3312.1                             | 470.7±292.4                                |
| ≥40                                    | 19       | 289.1±285.9                               | 6223.8±3656.4                             | 688.9±409.0                                |
| Pre-pregnancy BMI (kg/m <sup>2</sup> ) | 675      | 0.18*                                     | 0.10*                                     | -0.07                                      |
| Underweight (<18.5)                    | 22       | 61.4±33.9                                 | 1864.1±1515.9                             | 306.2±234.2                                |
| Normal (≥18.5-25)                      | 437      | 105.0±104.6                               | 2825.8±2733.2                             | 400.5±295.7                                |
| Overweight (≥25-30)                    | 137      | 118.8±95.0                                | 3347.1±3525.8                             | 371.1±240.6                                |
| Obese (≥30)                            | 79       | 133.3±110.0                               | 2927.5±2980.4                             | 317.3±170.6                                |
| Weight gain during pregnancy (kg)      | 566      | -0.10*                                    | -0.12*                                    | -0.04                                      |
| Ethnic origin                          |          |                                           |                                           |                                            |
| Other                                  | 37       | 113.5±110.6                               | 2948.3±3235.7                             | 362.9±269.6                                |
| Greek                                  | 648      | 109.0±101.4                               | 2936.4±2980.8                             | 385.1±283.0                                |
| Education                              |          |                                           |                                           |                                            |
| Low                                    | 105      | 98.4±75.7                                 | 2663.3± 2827.4                            | 298.0± 233.9                               |
| Medium                                 | 347      | 100.8±86.6                                | 2737.0 ± 2842.7                           | 379.0± 316.3                               |
| High                                   | 226      | 128.1±129.6                               | 3295.7±3047.0                             | 423.9±197.2                                |
| Parity                                 |          |                                           |                                           |                                            |
| Primiparous                            | 284      | 94.8±64.5                                 | 2496.3±2364.8                             | 362.6±324.9                                |
| Multiparous                            | 378      | 116.4±104.6                               | 3255.6±3390.5                             | 397.1±241.6                                |
| Smoking during pregnancy               |          |                                           |                                           |                                            |
| Never                                  | 432      | 105.2±90.3                                | 2860.4±2773.9                             | 372.7±239.6                                |
| Ever                                   | 236      | 117.0±122.2                               | 2930.2±3096.5                             | 395.5±325.1                                |

| <b>Characteristic</b>               | <b>N</b> | <b>HCB<br/>r<sup>a</sup> or Mean ± SD</b> | <b>DDE<br/>r<sup>a</sup> or Mean ± SD</b> | <b>PCBs<br/>r<sup>a</sup> or Mean ± SD</b> |
|-------------------------------------|----------|-------------------------------------------|-------------------------------------------|--------------------------------------------|
| Type of delivery                    |          |                                           |                                           |                                            |
| Vaginal                             | 339      | 103.2±83.0                                | 2752.7±2760.1                             | 364.2±214.6                                |
| Caesarian                           | 347      | 115.2±117.2                               | 3174.0±3370.4                             | 408.5±344.9                                |
| Breastfeeding (months)              | 663      | 0.001                                     | 0.04                                      | 0.09*                                      |
| Never                               | 85       | 140.9±148.5                               | 3109.5±3062.1                             | 389.2±236.1                                |
| Ever                                | 578      | 105.6±94.1                                | 2966.9±3142.9                             | 384.4±281.8                                |
| BMI at child's 4 years              | 662      | 0.16*                                     | 0.11*                                     | -0.09*                                     |
| Underweight (<18.5)                 | 20       | 87.0±52.7                                 | 2024.2±1705.2                             | 371.3±222.3                                |
| Normal (≥18.5-25)                   | 337      | 100.6±91.7                                | 2679.3±2587.7                             | 405.0±267.4                                |
| Overweight (≥25-30)                 | 201      | 116.9±115.1                               | 3300.0±3196.8                             | 373.1±314.4                                |
| Obese (≥30)                         | 104      | 132.4±117.9                               | 3016.3±3336.3                             | 332.6±211.7                                |
| Child characteristics at birth      |          |                                           |                                           |                                            |
| Sex                                 |          |                                           |                                           |                                            |
| Boy                                 | 358      | 107.3±98.8                                | 3023.9±3134.7                             | 375.2±294.0                                |
| Girl                                | 331      | 111.1±104.7                               | 2888.3±3032.1                             | 397.5±281.8                                |
| Birth weight (g)                    | 686      | -0.09*                                    | -0.07*                                    | -0.04                                      |
| Gestational age (completed weeks)   | 686      | -0.08*                                    | -0.12*                                    | -0.03                                      |
| Weight at 4 years (kg)              | 689      | 0.12*                                     | 0.07                                      | 0.02                                       |
| Child characteristics at 4 years    |          |                                           |                                           |                                            |
| Height (cm)                         | 689      | 0.11*                                     | 0.04                                      | 0.03                                       |
| BMI (kg/m <sup>2</sup> )            | 689      | 0.08*                                     | 0.05                                      | -0.01                                      |
| Triceps skinfold thickness (mm)     | 657      | 0.07                                      | 0.04                                      | 0.06                                       |
| Subscapular skinfold thickness (mm) | 661      | 0.07                                      | 0.06                                      | 0.01                                       |
| Suprailiac skinfold thickness (mm)  | 643      | 0.05                                      | 0.05                                      | 0.04                                       |
| Quadriceps skinfold thickness (mm)  | 621      | 0.10                                      | 0.06                                      | 0.04                                       |
| Sum of skinfolds (mm)               | 668      | 0.09*                                     | 0.03                                      | 0.06                                       |
| Waist circumference (cm)            | 683      | 0.14*                                     | 0.12*                                     | 0.06                                       |
| Systolic blood pressure (mmHg)      | 552      | 0.11*                                     | 0.09*                                     | 0.04                                       |

| <b>Characteristic</b>           | <b>N</b> | <b>HCB<br/>r<sup>a</sup> or Mean ± SD</b> | <b>DDE<br/>r<sup>a</sup> or Mean ± SD</b> | <b>PCBs<br/>r<sup>a</sup> or Mean ± SD</b> |
|---------------------------------|----------|-------------------------------------------|-------------------------------------------|--------------------------------------------|
| Diastolic blood pressure (mmHg) | 552      | 0.08                                      | 0.09*                                     | 0.02                                       |
| Total Cholesterols (mg/dl)      | 588      | 0.02                                      | 0.06                                      | 0.06                                       |
| HDL Cholesterol (mg/dl)         | 588      | -0.03                                     | 0.02                                      | -0.07                                      |
| LDL Cholesterols (mg/dl)        | 588      | 0.02                                      | 0.05                                      | 0.07                                       |
| C-reactive protein (ml/dl)      | 540      | 0.06                                      | 0.09*                                     | 0.03                                       |
| Leptin (ng/ml)                  | 580      | 0.11*                                     | 0.12*                                     | 0.07                                       |
| Adiponectin (ul/ml)             | 581      | -0.04                                     | 0.03                                      | -0.05                                      |

<sup>a</sup>Spearman rho.

\*p<0.05 for Spearman correlation.

**Table S3.** Associations of in utero POPs exposure with child lipids and adiponectin levels at 4 years of age, Mother-child cohort “Rhea” in Crete, Greece.

| <b>Outcome</b>                                | <b>N</b> | <b>Exposure<sup>a</sup></b> | <b>Adjusted Model<sup>b</sup></b> |
|-----------------------------------------------|----------|-----------------------------|-----------------------------------|
| Total Cholesterol (mg/dl) [ $\beta$ (95% CI)] | 448      | HCB                         | -0.54 (-13.26, 12.18)             |
|                                               |          | DDE                         | 4.44 (-3.35, 12.23)               |
|                                               |          | PCBs                        | 6.85 (-7.48, 21.17)               |
| HDL Cholesterol (mg/dl) [ $\beta$ (95% CI)]   | 448      | HCB                         | -0.14 (-5.12, 4.84)               |
|                                               |          | DDE                         | 2.77 (-0.28, 5.81)                |
|                                               |          | PCBs                        | -2.44 (-8.05, 3.17)               |
| Adiponectin (ul/ml) [ $\beta$ (95% CI)]       | 442      | HCB                         | 0.82 (-3.14, 4.77)                |
|                                               |          | DDE                         | 1.82 (-0.61, 4.24)                |
|                                               |          | PCBs                        | -2.10 (-6.57, 2.37)               |

<sup>a</sup>POP concentrations are  $\log_{10}$  transformed, in pg/ml. <sup>b</sup>Adjusted for maternal serum triglycerides and cholesterol, maternal age, pre-pregnancy BMI, parity, maternal educational level, smoking status during pregnancy, breastfeeding duration, child sex, birth weight, gestational age and exact age at 4 year examination.

**Table S4.** Association between POPs and birth outcomes in multipollutant models including DDE, HCB and PCBs.

| <b>Outcome</b>                                     | <b>Exposure<sup>a</sup></b> | <b>Adjusted Model<sup>b</sup></b> |
|----------------------------------------------------|-----------------------------|-----------------------------------|
| Rapid Growth 0-6 months <sup>c</sup> [RR (95% CI)] | HCB                         | 1.88 (0.90, 3.99)                 |
|                                                    | DDE                         | 1.20 (0.79, 1.88)                 |
|                                                    | PCBs                        | 0.83 (0.37, 1.83)                 |
| BMI z-score at 4 years [β (95% CI)]                | HCB                         | 0.41 (-0.004, 0.82)               |
|                                                    | DDE                         | 0.20 (-0.05, 0.45)                |
|                                                    | PCBs                        | -0.07 (-0.53, 0.39)               |
| Obesity at 4 years [RR (95% CI)]                   | HCB                         | 5.78 (1.13, 29.50)                |
|                                                    | DDE                         | 2.87 (0.86, 9.52)                 |
|                                                    | PCBs                        | 1.16 (0.13, 10.47)                |
| WC ≥90th percentile <sup>d</sup> [RR (95% CI)]     | HCB                         | 2.10 (0.74, 5.95)                 |
|                                                    | DDE                         | 2.71 (1.39, 5.28)                 |
|                                                    | PCBs                        | 0.86 (0.23, 3.21)                 |
| Sum of skinfolds (mm) at 4 years [β (95% CI)]      | HCB                         | 6.35 (-0.01, 12.70)               |
|                                                    | DDE                         | 1.04 (-2.84, 4.91)                |
|                                                    | PCBs                        | 2.41 (-6.78, 9.50)                |
| Systolic blood pressure (mmHg) [β (95% CI)]        | HCB                         | 3.66 (-0.52, 7.83)                |
|                                                    | DDE                         | 1.60 (-0.97, 4.18)                |
|                                                    | PCBs                        | -0.39 (-5.05, 4.27)               |
| Diastolic blood pressure (mmHg) [β (95% CI)]       | HCB                         | 2.53 (-0.40, 5.45)                |
|                                                    | DDE                         | 1.72 (-0.08, 3.53)                |
|                                                    | PCBs                        | -2.59 (-5.86, 0.68)               |
| C-reactive protein >3 mg/L [RR (95% CI)]           | HCB                         | 1.78 (0.43, 7.42)                 |
|                                                    | DDE                         | 1.76 (0.70, 4.43)                 |
|                                                    | PCBs                        | 2.57 (0.43, 15.40)                |
| Leptin (ng/ml) [β (95% CI)]                        | HCB                         | 1.59 (-0.32, 3.50)                |
|                                                    | DDE                         | 0.84 (-0.29, 1.98)                |
|                                                    | PCBs                        | 0.43 (-1.72, 2.58)                |

<sup>a</sup>POP concentrations are log<sub>10</sub> transformed, in pg/ml. <sup>b</sup>Adjusted for maternal serum triglycerides and cholesterol, maternal age, pre-pregnancy BMI, parity, maternal educational level, smoking status during pregnancy, breastfeeding duration, child sex, birth weight, gestational age and exact age at 4 year examination. <sup>c</sup>Rapid growth models are adjusted for maternal serum triglycerides and cholesterol, maternal age, pre-pregnancy BMI, parity, maternal educational level, smoking status during pregnancy, breastfeeding duration, child sex and gestational age. <sup>d</sup>WC ≥58.6cm.

**Table S5.** Associations of in utero POPs exposure with child BMI at 4 years of age in the subgroups defined by infant sex, maternal smoking and maternal prepregnancy BMI status.

| POP and infant subgroup                 | N   | z-BMI <sup>a</sup><br>β (95% CI) |
|-----------------------------------------|-----|----------------------------------|
| <b>HCB (log<sub>10</sub> pg/ml)</b>     |     |                                  |
| All                                     | 531 | 0.49 (0.12, 0.86)                |
| Boys                                    | 267 | 0.37 (-0.18, 0.92)               |
| Girls                                   | 264 | 0.58 (0.06, 1.11)                |
| p-interaction                           |     | 0.141                            |
| Non-smokers                             | 355 | -0.43 (-0.05, 0.90)              |
| Smokers                                 | 176 | 0.31 (-0.31, 0.93)               |
| p-interaction                           |     | 0.192                            |
| Pre-pregnancy BMI <25 kg/m <sup>2</sup> | 357 | 0.62 (0.20, 1.04)                |
| Pre-pregnancy BMI ≥25 kg/m <sup>2</sup> | 174 | 0.01 (-0.77, 0.79)               |
| p-interaction                           |     | 0.973                            |
| Inadequate GWG*                         | 100 | 0.86 (0.04, 1.70)                |
| Adequate GWG*                           | 156 | 0.40 (-0.31, 1.10)               |
| Excessive GWG*                          | 193 | 0.17 (-0.46, 0.80)               |
| p-interaction                           |     | 0.470/0.128                      |
| <b>DDE (log<sub>10</sub> pg/ml)</b>     |     |                                  |
| All                                     | 531 | 0.27 (0.04, 0.51)                |
| Boys                                    | 267 | 0.33 (-0.01, 0.67)               |
| Girls                                   | 264 | 0.25 (-0.08, 0.57)               |
| p-interaction                           |     | 0.730                            |
| Non-smokers                             | 355 | 0.27 (-0.01, 0.56)               |
| Smokers                                 | 176 | 0.17 (-0.26, 0.59)               |
| p-interaction                           |     | 0.467                            |
| Pre-pregnancy BMI <25 kg/m <sup>2</sup> | 357 | 0.33 (0.06, 0.60)                |
| Pre-pregnancy BMI ≥25 kg/m <sup>2</sup> | 174 | -0.05 (-0.50, 0.40)              |
| p-interaction                           |     | 0.894                            |
| Inadequate GWG*                         | 100 | 0.45 (-0.10, 1.00)               |
| Adequate GWG*                           | 156 | 0.32 (-0.12, 0.75)               |
| Excessive GWG*                          | 193 | 0.31 (-0.10, 0.72)               |
| p-interaction                           |     | 0.905/0.480                      |
| <b>PCBs (log<sub>10</sub> pg/ml)</b>    |     |                                  |
| All                                     | 531 | 0.21 (-0.20, 0.63)               |
| Boys                                    | 267 | 0.30 (-0.27, 0.87)               |
| Girls                                   | 264 | 0.21 (-0.41, 0.83)               |
| p-interaction                           |     | 0.550                            |
| Non-smokers                             | 355 | 0.19 (-0.31, 0.69)               |
| Smokers                                 | 176 | 0.17 (-0.62, 0.95)               |
| p-interaction                           |     | 0.276                            |
| Pre-pregnancy BMI <25 kg/m <sup>2</sup> | 357 | 0.03 (-0.46, 0.51)               |
| Pre-pregnancy BMI ≥25 kg/m <sup>2</sup> | 174 | 0.35 (-0.46, 1.17)               |



| <b>POP and infant subgroup</b> | <b>N</b> | <b>z-BMI<sup>a</sup><br/>β (95% CI)</b> |
|--------------------------------|----------|-----------------------------------------|
| p-interaction                  |          | 0.172                                   |
| Inadequate GWG*                | 100      | 0.87 (-0.11, 1.85)                      |
| Adequate GWG*                  | 156      | -0.15 (-0.95, 0.64)                     |
| Excessive GWG*                 | 193      | 0.13 (-0.63, 0.88)                      |
| p-interaction                  |          | 0.674/0.264                             |

<sup>a</sup>Adjusted for maternal serum triglycerides and cholesterol, maternal age, pre-pregnancy BMI, parity, maternal educational level, smoking status during pregnancy, breastfeeding duration, child sex, birth weight, gestational age and exact age at 4 year examination.

\*Gestational weight gain (GWG) categories: inadequate, adequate and excessive, according to The Institute of Medicine (IOM) guidelines of 2009 based on pre-pregnancy BMI; Rasmussen K.M., Yaktine A.L. (Eds.), Weight gain during pregnancy: reexamining the guidelines, National Academies Press, Washington, DC (2009).

**Table S6.** Associations of in utero POP exposures with the outcomes under study in the total population and without out preterm births and low birth weight neonates<sup>a</sup>.

| <b>Outcome</b>                                       | <b>Exposure</b> | <b>Total population</b> | <b>Excluding preterm newborns</b> | <b>Excluding low birth weight newborns</b> |
|------------------------------------------------------|-----------------|-------------------------|-----------------------------------|--------------------------------------------|
| Rapid Growth 0-6 months [RR (95% CI)]                | HCB             | 1.94 (0.99, 3.77)       | 2.21 (1.03, 4.77)                 | 1.79 (-0.89, 3.62)                         |
|                                                      | DDE             | 1.33 (0.89, 1.99)       | 1.31 (0.81, 2.11)                 | 1.38 (0.90, 2.12)                          |
|                                                      | PCBs            | 1.20 (0.59, 2.46)       | 1.19 (0.51, 2.79)                 | 1.15 (0.54, 2.47)                          |
| BMI z-score at 4 years [ $\beta$ (95% CI)]           | HCB             | 0.49 (0.12, 0.86)       | 0.56 (0.18, 0.95)                 | 0.54 (0.17, 0.92)                          |
|                                                      | DDE             | 0.27 (0.04, 0.51)       | 0.33 (0.08, 0.57)                 | 0.30 (0.06, 0.54)                          |
|                                                      | PCBs            | 0.21 (-0.20, 0.63)      | 0.21 (-0.23, 0.65)                | 0.24 (-0.18, 0.67)                         |
| Obesity at 4 years [RR (95% CI)]                     | HCB             | 8.14 (1.85, 35.81)      | 11.8 (2.62, 53.33)                | 8.36 (1.89, 37.06)                         |
|                                                      | DDE             | 3.80 (1.19, 12.14)      | 3.83 (0.96, 15.27)                | 3.69 (1.15, 11.88)                         |
|                                                      | PCBs            | 3.91 (0.49, 31.27)      | 6.76 (0.64, 71.97)                | 3.70 (0.45, 30.18)                         |
| WC $\geq$ 90th percentile [RR (95% CI)]              | HCB             | 3.49 (1.08, 11.28)      | 3.21 (1.15, 8.94)                 | 2.61 (1.01, 6.72)                          |
|                                                      | DDE             | 3.76 (1.70, 8.30)       | 2.67 (1.35, 5.28)                 | 2.61 (1.38, 4.94)                          |
|                                                      | PCBs            | 2.08 (0.65, 6.71)       | 1.11 (0.30, 4.15)                 | 1.64 (0.50, 5.37)                          |
| Sum of skinfolds (mm) at 4 years [ $\beta$ (95% CI)] | HCB             | 7.71 (2.04, 13.39)      | 8.43 (2.67, 14.19)                | 8.05 (2.18, 13.92)                         |
|                                                      | DDE             | 2.75 (-0.86, 6.35)      | 3.64 (-0.11, 7.39)                | 3.31 (-0.42, 7.03)                         |
|                                                      | PCBs            | 5.74 (-0.68, 12.16)     | 4.99 (-1.65, 11.63)               | 6.34 (-0.28, 12.97)                        |
| Systolic blood pressure (mmHg) [ $\beta$ (95% CI)]   | HCB             | 4.34 (0.63, 8.05)       | 4.16 (0.34, 7.98)                 | 4.68 (0.93, 8.43)                          |
|                                                      | DDE             | 2.31 (-0.07, 4.69)      | 2.99 (0.44, 5.53)                 | 2.51 (0.09, 4.93)                          |
|                                                      | PCBs            | 2.16 (-2.03, 6.34)      | 1.41 (-3.01, 5.83)                | 2.41 (-1.83, 6.64)                         |
| Diastolic blood pressure (mmHg) [ $\beta$ (95% CI)]  | HCB             | 2.48 (-0.13, 5.09)      | 2.40 (-0.33, 5.13)                | 2.49 (-0.16, 5.13)                         |
|                                                      | DDE             | 1.79 (0.13, 3.46)       | 1.72 (-0.10, 3.54)                | 1.92 (0.22, 3.61)                          |
|                                                      | PCBs            | -0.49 (-3.43, 2.45)     | -1.01 (-4.16, 2.14)               | -0.17 (-3.15, 2.81)                        |
| C-reactive protein $>3$ mg/L [RR (95% CI)]           | HCB             | 2.88 (0.86, 9.64)       | 2.77 (0.78, 9.80)                 | 2.97 (0.88, 10.01)                         |
|                                                      | DDE             | 2.23 (0.94, 5.29)       | 2.56 (1.04, 6.27)                 | 2.42 (1.02, 5.78)                          |
|                                                      | PCBs            | 4.50 (0.89, 22.76)      | 3.21 (0.59, 17.47)                | 4.15 (0.81, 21.23)                         |
| Leptin (ng/ml) [ $\beta$ (95% CI)]                   | HCB             | 2.15 (0.42, 3.89)       | 2.39 (0.55, 4.24)                 | 2.40 (0.60, 4.19)                          |
|                                                      | DDE             | 1.21 (0.16, 2.27)       | 1.20 (0.05, 2.35)                 | 1.19 (0.09, 2.29)                          |
|                                                      | PCBs            | 1.55 (-0.42, 3.52)      | 1.43 (-0.72, 3.58)                | 1.42 (-0.61, 3.46)                         |

<sup>a</sup>n of excluded children born preterm ranges from 66 to 45 and children born with low birth weight from 23 to 18 depending on the outcomes.
